# Spatio-temporal propagation of COVID-19 pandemics

Bnaya Gross,<sup>1,\*</sup> Zhiguo Zheng,<sup>2</sup> Shiyan Liu,<sup>2</sup> Xiaoqi Chen,<sup>2</sup>  
Alon Sela,<sup>3,1</sup> Jianxin Li,<sup>4,5</sup> Daqing Li,<sup>6,2</sup> and Shlomo Havlin<sup>1</sup>

<sup>1</sup>*Department of Physics, Bar-Ilan University, Ramat-Gan 52900, Israel*

<sup>2</sup>*School of Reliability and Systems Engineering, Beihang University, Beijing 100191, China*

<sup>3</sup>*Department of Industrial Engineering, Ariel University, Ariel, Israel*

<sup>4</sup>*Beijing Advanced Innovation Center for Big Data and Brain Computing, Beihang University, Beijing 100083, China*

<sup>5</sup>*State Key Laboratory of Software Development Environment, Beihang University, Beijing 100083, China*

<sup>6</sup>*Beijing Advanced Innovation Center for Big Data-Based Precision Medicine, Beihang University, Beijing 100191, China*

(Dated: July 9, 2020)

The new coronavirus known as COVID-19 is spread world-wide since December 2019. Without any vaccination or medicine, the means of controlling it are limited to quarantine and social distancing. Here we study the spatio-temporal propagation of the first wave of the COVID-19 virus in China and compare it to other global locations. We provide a comprehensive picture of the spatial propagation from Hubei to other provinces in China in terms of distance, population size, and human mobility and their scaling relations. Since strict quarantine has been usually applied between cities, more insight about the temporal evolution of the disease can be obtained by analyzing the epidemic within cities, especially the time evolution of the infection, death, and recovery rates which affected by policies. We study and compare the infection rate in different cities in China and provinces in Italy and find that the disease spread is characterized by a two-stages process. At early times, at order of few days, the infection rate is close to a constant probably due to the lack of means to detect infected individuals before infection symptoms are observed. Then at later times it decays approximately exponentially due to quarantines. The time evolution of the death and recovery rates also distinguish between these two stages and reflect the health system situation which could be overloaded.

Keywords: COVID-19, Quarantine efficiency, Spatio-temporal analysis

## I. INTRODUCTION

Since December 2019 the world is fiercely struggling against an epidemics of a novel Coronavirus named COVID-19 identified in Wuhan, a city of 11 million people in Hubei Province, China. A medical cure from the disease is yet unavailable and the number of infected cases is increasing. As for April 1 2020, the virus has already spread to more than 100 countries around the world with more than 1 million confirmed cases.

In the absence of both medicine and vaccination, strategies of effective distributing of them are not considered yet and the options to stop the propagation of the disease are currently to quarantines the infected individuals [1] and social distancing [2] in order to cut the infection channels. Statistical estimations of the incubating (latency) period of the virus which includes no illness symptoms vary between different populations and found to be of about 4-6 days [3] while a long incubation period of 19 days has also been observed [4]. The 14 days quarantine period, which has been adopted by many countries, is a result of the high limit of the 95% confidence levels [5] of this incubating period. Under this quarantine strategy, the virus spreading could be alleviated.

The first wave of COVID-19 in China was controlled

much faster compared to other locations in the world. Although China was the country with most infection cases up to the middle of March 2020 (Fig. 1a), it was able to stop the spreading while in other countries the disease kept propagating close to exponentially as can be seen in Fig. 1b. In fact, in most cities in China the spreading stopped approximately after 20 days as shown in Fig. 1c. In contrast, in other locations it got controlled very slowly as shown, e.g., for Italy in Fig. 1d. This suggests that one can learn from the disease decay in China and apply appropriate measures in other locations in the world. While a general estimation of the disease evolution has been recently conducted [6, 7], a comprehensive analysis of its spatio-temporal propagation which is important for epidemic forecast and modelling [8–10], is still missing. In this manuscript, we study some aspects of the spatio-temporal propagation of the first wave of the COVID-19 virus and discuss the differences between China and other countries. The data source is available at <https://github.com/canghailan/Wuhan-2019-nCoV>.

We study the spatial dynamics of the COVID-19 originated from Hubei and find scaling (power) laws for the number of infected individuals in different provinces as a function of the province population, the distance from Hubei and their relation to the population migration from Hubei. The human mobility [11–13] which has been suggested to follow a Lévy-flight pattern [14–16] is significantly important for modelling the spatial propagation of the disease. A reasonable explanation for the corre-

---

\*Electronic address: [bnaya.gross@gmail.com](mailto:bnaya.gross@gmail.com)

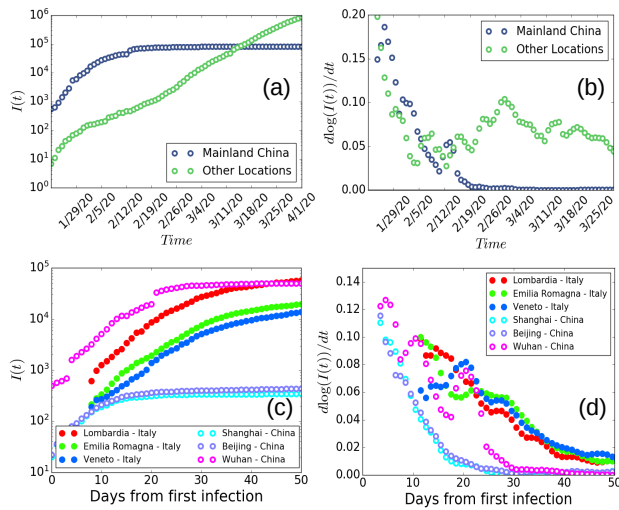

**FIG. 1: General view of the COVID-19 propagation as for April 1, 2020.** (a) The number of confirmed infected cases  $I(t)$  in mainland China and other locations around the globe on a semi-log scale. Less than two months since COVID-19 inception, the number of infected individuals in China almost reaches saturation while the number in other locations have been rapidly increasing. (b) The slope (derivative) of  $\log(I(t))$ . The COVID-19 propagation decays rapidly in most cities in China and the disease is almost stabilized with the derivative approaches zero. In contrast, cities in other locations around the globe have been still in their early stage and the disease was still spreading as can be seen by the almost constant or even increase of the derivative. (c) The number of confirmed infected cases  $I(t)$  in different locations in China and Italy since the first infection. While in most cities in China the disease stabilized after a short time of approximately 20 days on average, the disease in Italy has been still spreading and approached stability much later, see (d). The slope (derivative) of  $\log(I(t))$  in different locations in China and Italy since the first infection.

lation between the population migration and the disease spread can be the strict quarantines applied in most cities in China after the shutdown of Wuhan traffic [17–19]. These quarantines were effective and probably prevented infected individuals to further spread the disease to other cities. Hence, the number of infected individuals is highly correlated to the population migration from Hubei before the shutdown, Fig. 2.

As a result of the heterogeneous structure of cities in a country [20], quarantine has been usually applied strictly between cities and the mobility within cities was less restricted. Thus, more insight can be obtained in analyzing the epidemic within cities while studying the disease decay on a country scale might lead to uncertain conclusion regarding the disease situation since the disease may propagate in one city and decay in another. Our results suggest that the temporal propagation of the disease in most cities in China is similar. In fact, many cities in China experienced a two-stages process of the disease. At early times (of order of few days), the disease was

undetectable due to the incubating period while spreading within the city. Another possibility is that it takes a few days for the city to become prepared for the disease. At later times, the infected individuals have been quarantined and the disease started to decay approximately exponentially in many cities. The quarantines have been effective to extinct the disease inside a city and reach a stable state with infection rates close to zero. Since quarantines were applied almost at the same time in most cities in China, we find that the decay stage of the disease starts almost at the same time for most of the cities no matter if they are large central cities, small cities or even Hubei province cities. For this reason most of the cities experience a similar 10-30 days characteristic time of the disease drastic reduction. In addition, most cities in China show similar exponential growth of the recovery rate which can reflect the similarity of health system efficiency. This is in marked contrast to Italy which did not show an exponential growth probably due to overloaded health system by the many unexpected patients or because of a less obedient population to the health systems regulations.

## II. SPATIAL SCALING

One of the most important properties of epidemics spreading is its spatial propagation, a characteristic which mainly depends on the epidemic mechanism, human mobility and control strategy. While the relation of human mobility to the epidemic spread has been shown [21, 22], a comprehensive picture of the epidemic spread in terms of distance, population size and human mobility and their scaling relations is still missing. We assume that the number of infected individuals in different provinces in China can be generally described as

$$I = f(r, m) \quad (1)$$

where  $r$  is the distance of the province from Wuhan and  $m$  is the population of the province. Since  $r$  and  $m$  are independent of each others, one can assume and study the scaling relation of each of them independently,

$$I \sim r^\alpha \quad (2)$$

and

$$I \sim m^\beta. \quad (3)$$

Since  $r$  and  $m$  are independent, Eq. 1 can assume the scaling form (in analogous with population mobility [23]),

$$I \sim r^\nu / m^\mu \quad (4)$$

from which the relation  $\nu/\alpha - \mu/\beta = 1$  should be satisfied. Using weighted least squares regression for the scaling we find in Fig. 2a that  $\alpha \simeq -1.87 \pm 0.23$  in agreement with a recent study [24] and  $\beta \simeq 1.18 \pm 0.20$  as shown in Fig. 2b.

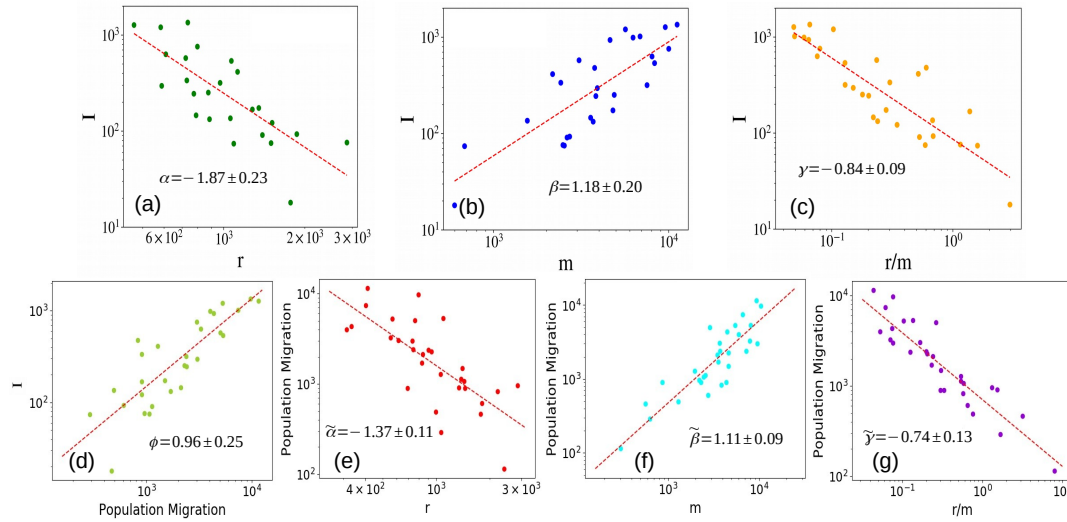

**FIG. 2: Spatial propagation analysis of the COVID-19 in China.** (a) The number of infected individuals  $I$  (as of March 1, 2020) as a function of the distance from Hubei. The scaling follows Eq. (2) with  $\alpha = -1.87 \pm 0.23$ . (b) The number of infected individuals  $I$  as a function of the city population,  $m$ . The scaling follows Eq. (3) with  $\beta = 1.18 \pm 0.20$ . (c) The scaling of  $I$  with the distance-population ratio  $r/m$  follows Eq. (5) with  $\gamma = -0.84 \pm 0.09$ . The exponents within the errorbars follow Eq. (6). (d) The scaling of infected individuals with the population migration from Hubei. Almost linear scaling is observed with  $\phi = 0.96 \pm 0.25$  strongly relating the disease propagation to human mobility. The scaling of population migration with the (e) distance, (f) population and (g) distance-population ratio follow Eq. (8) with  $\tilde{\alpha} = -1.37 \pm 0.11$ ,  $\tilde{\beta} = 1.11 \pm 0.09$  and  $\tilde{\gamma} = -0.74 \pm 0.13$  respectively. The large value of  $\alpha$  compared to  $\tilde{\alpha}$  possibly indicate the quarantines efficiency.

The minimization of the error of the exponents relation yields that  $\nu = \mu \simeq -0.84 \pm 0.09$ . Thus, Eq. 4 takes the form

$$I \sim (r/m)^\gamma \quad (5)$$

with  $\gamma = \nu = \mu \simeq -0.84 \pm 0.09$  as shown in Fig. 2c. Thus,  $r/m$  can be regarded as a suitable distance-population parameter. The relation between these 3 exponents thus,

$$1/\alpha - 1/\beta = 1/\gamma. \quad (6)$$

In order to better understand the basic mechanism of the disease propagation, we examine the relation of the number of infected individuals in different provinces in China with the population migration,  $P_m$ , from Hubei. Our results shown in Fig. 2d suggest an almost linear scaling relation

$$I \sim P_m^\phi \quad (7)$$

with  $\phi = 0.96 \pm 0.25$ . This relation can be understood since strict quarantines were applied in most cities in China after the shutdown of Wuhan traffic. The quarantines were efficient to prevent infected individuals to spread the disease to other cities leading to a close to linear relation between the number of infected individuals and the population migration from Hubei. This supports

the relation between the disease propagation and human mobility and indicates that earlier quarantine of Hubei could attenuate the world-wide spreading.

To further study the relation between population migration and the disease propagation we measured the population migration number,  $P_m$ , as a function of the distance, population and the distance-population parameter. We assume the following scaling relations [23],

$$\begin{aligned} P_m &\sim r^{\tilde{\alpha}} \\ P_m &\sim m^{\tilde{\beta}} \\ P_m &\sim (r/m)^{\tilde{\gamma}} \end{aligned} \quad (8)$$

with  $\tilde{\alpha} = -1.37 \pm 0.11$ ,  $\tilde{\beta} = 1.11 \pm 0.09$  and  $\tilde{\gamma} = -0.74 \pm 0.13$  as shown in Figs. 2e,f,g respectively. These exponents for the population migration represent the analogy of the exponents  $\alpha$ ,  $\beta$  and  $\gamma$  of the number of infected individuals and follow a similar relation as Eq. 6 within the errorbars. Interestingly,  $\tilde{\alpha}$  is lower than  $\alpha$  and it can possibly be understood by quarantines efficiency which reduces the spatial spread of infected individuals compared to the population migration. A summary of the exponents of 2-8 can be found in Table I.

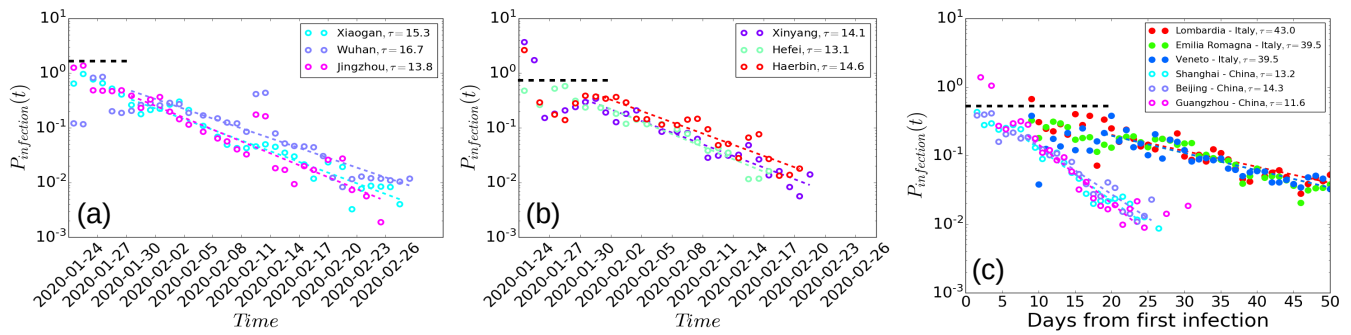

FIG. 3: **Two-stages infection rate.** The infection rate  $P_{infection}(t)$  for different types of cities: (a) cities in Hubei province, (b) small cities in China and (c) large central cities in China and provinces in Italy. At early times an approximate constant infection rate,  $P_0 \sim 0.74 \pm 0.55$  is usually observed (below the black horizontal dashed line). After a few days, an exponential decay is observed in China representing the efficiency of the quarantines. The colored dashed lines are the best fit for the exponential decay, Eq. 10. The characteristic decay time  $\tau$  in Eq. 10 represents the time it takes to control the disease in a city. Interestingly, while the infection rate in cities (provinces) in both China and Italy is decaying, the characteristic decay parameter  $\tau$  in Italy is several times longer than China due to different quarantine efficiency.

| Spatial          |                   |
|------------------|-------------------|
| $\alpha$         | $-1.87 \pm 0.23$  |
| $\tilde{\alpha}$ | $-1.37 \pm 0.11$  |
| $\beta$          | $1.18 \pm 0.20$   |
| $\tilde{\beta}$  | $1.11 \pm 0.09$   |
| $\gamma$         | $-0.84 \pm 0.09$  |
| $\tilde{\gamma}$ | $-0.74 \pm 0.13$  |
| $\phi$           | $0.96 \pm 0.25$   |
| Temporal         |                   |
| $P_0$            | $0.74 \pm 0.55$   |
| $\tau$           | $19.4 \pm 8.3$    |
| $k$              | $0.027 \pm 0.006$ |

TABLE I: **Spatio-temporal scaling exponents.** **Spatial** -  $\alpha$  is the exponent of the spatial distribution of infected individuals, Eq. 2.  $\beta$  is the scaling exponent of the population,  $m$ , Eq. 3, and  $\gamma$  is the scaling exponent for the scaling function of the distance-population ratio  $r/m$ , Eq. 5. The exponent  $\phi$  relates the number of infected individuals to the measured number of population migration with almost linear scaling, Eq. 7.  $\tilde{\alpha}$ ,  $\tilde{\beta}$  and  $\tilde{\gamma}$  are the exponents characterizing the scaling of the population migration with  $r$ ,  $m$  and  $r/m$  respectively, Eq. 8. **Temporal** -  $P_0$  is the approximately constant infection rate at early times while the disease is spreading.  $\tau$  is the characteristic time of the disease decay at later times, assuming exponential decay, Eq. 10.  $k$  is the growth parameter of the recovery rate, Eq. 13.

### III. TEMPORAL BEHAVIOUR

The absence of vaccination makes the control of the disease very difficult and the main action possible is to quarantine infected individuals and those that were in contact with them in order to prevent further spreading. This approach is effective but limited since an infected

individual can spread the disease before showing illness symptoms. Nonetheless, an efficient quarantine strategy can succeed in controlling the disease and a method to quantify its efficiency is needed. In addition, while a recent study showed that quarantine was efficient resulting in a subexponential growth of the confirmed cases in different cities in China [6], it did not show how it affects the infection rate which is important for modeling. Moreover, a temporal analysis of the death and recovery rates is required as they may be affected by the health system efficiency which might be overloaded. Here we will analyze the temporal evolution of the infection, death, and recovery rates under the quarantine restrictions in different cities in China and compare it to different provinces in Italy.

Since quarantines have been usually applied within and between cities, studying the disease decay on a country scale might lead to uncertain conclusion regarding the disease situation since the disease may propagate in one city and decay in another. Thus, to further study the effect of quarantines, we measured the infection rate in different cities in China and different provinces in Italy. The infection rate,  $P_{infection}(t)$ , is measured for each city (province) using the total number of infected individuals in the city in a given day,  $I(t)$ , from the first day that infected individuals have been detected in the city. The infection rate at a given day is defined as the fraction of newly infected individuals emerging from the total number of infected individuals a day earlier

$$P_{infection}(t) = \frac{I(t) - I(t-1)}{I(t-1)}. \quad (9)$$

We examined three different types of cities in China. a) cities in Hubei province, b) small cities and c) large central cities as shown in Fig. 3a,b,c respectively. In all



three cases, an approximately constant infection rate is observed in early times. However, after a few days, a decay in the infection rate is observed. Determining if the decay is exponential or power-law can not be certain due to the few data points in the samples. Assuming exponential decay [25] gives a plausible consistent picture. In this case, Eq. 9 takes the form

$$P_{infection}(t) = \begin{cases} P_0 & t_0 < t < t_x \\ P_0 e^{-(t-t_x)/\tau} & t_x < t, \end{cases} \quad (10)$$

where  $P_0$  is the constant infection rate without constraints,  $t_0$  represents the time that the first infected individual was detected in the city,  $t_x$  is the time when the quarantine starts and  $\tau$  is the characteristic time for the disease drastic reduction. The approximately constant infection rate in early times represents the real infection rate of the disease before quarantines were applied to control the disease while the exponential decay in later times represents the efficiency of quarantines in reducing the infected rate. Small value of the parameter  $\tau$  indicate more efficient restrictions. The constant value  $t_x$  is very similar in different cities in China due to the similar emergency response of other provinces with respect to the epidemic outbreak. The exponential decay with low values of  $\tau$  indicates that quarantines are efficient to tame the disease in most cities in China and indeed, in the last days of February, the infection rate has been almost zero with rarely new cases as seen in Fig. 3. In marked contrast, the decay in Italy has been slower with much larger values of  $\tau$  indicating less efficient quarantine strategy as seen in Fig. 3c. While the infection rate might be biased by different number of tests and reporting policies [26], an efficient quarantine should still result with a decay of the infection rate.

While the infection rate characterize the quarantine efficiency, the death and recovery rates can characterize the health system efficiency which may be overloaded by the unexpected amount of patients. The death and recovery rates are defined as the fraction of the newly dead and recovered individuals at each day and the number of infected individual a days earlier

$$P_{death}(t) = \frac{D(t) - D(t-1)}{I(t-1)} \quad (11)$$

and

$$P_{recovery}(t) = \frac{R(t) - R(t-1)}{I(t-1)} \quad (12)$$

where  $D(t)$  is the number of dead people at time  $t$  and  $R(t)$  is the number of recovered at time  $t$ . The death rate in Wuhan shows an approximate exponential decay similar to the infection rate with characteristic time close to twice longer. In marked contrast, the provinces with most cases in Italy show much slower decay, as seen in Fig. 4a, which indicates an overloaded health system.

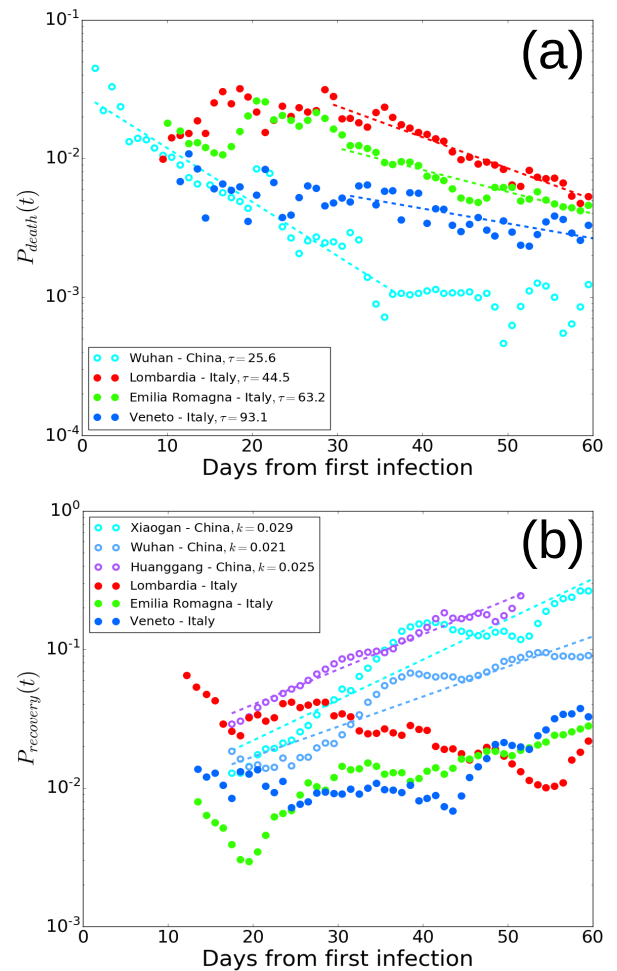

FIG. 4: **Death and recovery rates.** (a) The death rate in Wuhan shows an approximate exponential decay similar to the infection rate (other cities show poor statistics). The characteristic decay time  $\tau$  is about twice time longer for the death rate than the infection rate. Provinces in Italy with most cases show much slower decay suggesting an overloaded health system. (b) The recovery rate in China shows an approximate exponential growth as the disease is getting controlled, Eq. 13. The growth parameter  $k$  characterizes the health system efficiency. Provinces in Italy with most recovery cases do not show growth and remain approximately constant suggesting an overloaded health system as suggested by the death rate.

The recovery rate in China increases exponentially as the disease gets controlled with less new cases and can be well approximated as

$$P_{recovery}(t) \sim e^{kt}, \quad (13)$$

where  $k$  is the growth parameter which might indicate the health system efficiency. In Italy the recovery rate is approximately constant, as shown in Fig. 4b, which suggests, similarly to the death rate, an overloaded health system as shown in Fig. 4a.

The temporal parameters characterizing the infection, death and recovery rates are found to be similar for most

cities in China with  $P_0$  in the range 0.5-2 with an average of 0.74 and a standard deviation of 0.55 as shown in Fig. 5a. The value of  $\tau$  for most of the cities is 10-30 days while for a few cities the characteristic time can be longer as seen in Fig. 5b. The value of  $\tau$  may characterizes the efficiency of quarantines. The average value of  $\tau$  is 19.4 with standard deviation 8.3. The values of  $k$  are in range 0.015 - 0.045 and may characterize the health system efficiency. The average value of  $k$  is 0.027 with standard deviation 0.006. Summary of the temporal parameters can be found in Table I. The similar values of the temporal parameters in most cities in China is consistent with the strict quarantine applied in them simultaneously.

#### IV. DISCUSSION AND SUMMARY

While many countries have been struggling to overcome the first wave of the COVID-19, China controlled it relatively fast. Controlling the disease is not easy, the spread of the disease is highly related to population migration which assumed to follows a Lévy flight behavior, a characteristic of human mobility with long jumps which spread the disease rapidly. The incubating period together with the Lévy flight long jumps makes the disease very hard to control since by the time that infected individual is being detectable, it can already perform a long-distance trip and further spread the disease. This spatial dynamics is very important and should be taken into account in epidemic modeling. Despite these difficulties, an efficient quarantine strategy could control the disease leading to an exponential decay of the infection rate. This decay is characterized by the characteristic decay time  $\tau$  and allows a quantitative comparison between quarantine strategies performed in different places. In fact, the lifetime of the disease in a city is characterized by two stages, uncontrolled infection in early times (for few days) and decaying stage at later times once quarantines start to effect. These two stages can explain the temporal dynamics of the disease situation in China in the first wave and explain the situation in other locations in the world where similar strategies have been only partly adopted. Moreover, this two-stage process is very important for modeling since one should take into account how the infection rate changes in time due to quarantine strategies.

In addition, while the temporal dynamics of the infection rate is related to the quarantine efficiency, the temporal dynamics of the death and recovery rates is more related to the health system efficiency which may be overloaded or inefficient. Even though different countries are characterized by different age population distribution which suffers from different mortality rates [27], a sharp rise of the death rate (or very slow decay) may indicate an overloaded health system. The same conclusion applies for the case of a decay of the recovery rate.

Our work highlights the importance of efficient quar-

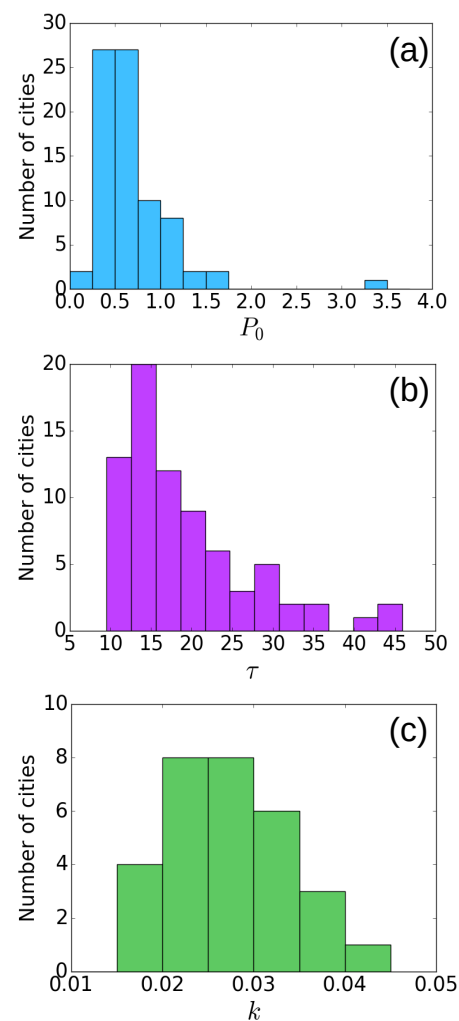

FIG. 5: **Statistical properties of the temporal behaviour of cities in China** (a) The constant infection rate,  $P_0$  is mostly in the range 0-2 while in a few cities it is much larger. The average value is 0.74 with standard deviation 0.55. (b) The distribution of the exponent  $\tau$  characterizing the extinction of the disease which found to be in the range 10-50 days. The average value is 19.4 with standard deviation 8.3. (c) The distribution of  $k$  characterizing the recovery rate and reflects the health system efficiency is found to be in the range between 0.015-0.045. The average value is 0.027 with standard deviation 0.006. The parameters are very similar in most cities in China consistent with the strict quarantine applied in them simultaneously.

antine strategies and the strong relation between population migration and the disease spreading. Moreover, our results suggest that early action may attenuate the disease propagation and prevent overload of the health system which have not been ready for the large amount of unexpected new patients.

## Acknowledgments

We thank Ivan Bonamassa for very useful discussions related to this project. We thank the Israel Science Foundation (Grant no. 189/19) and the joint China-Israel

Science Foundation (Grant no. 3132/19), ONR, the BIU Center for Research in Applied Cryptography and Cyber Security, and DTRA Grant no. HDTRA-1-19-1-0016 for financial support.

- [1] Qun Li, Xuhua Guan, Peng Wu, Xiaoye Wang, Lei Zhou, Yeqing Tong, Ruiqi Ren, Kathy SM Leung, Eric HY Lau, Jessica Y Wong, et al. Early transmission dynamics in wuhan, china, of novel coronavirus-infected pneumonia. *New England Journal of Medicine*, 2020.
- [2] Chenlin GU, Wei Jiang, Tianyuan Zhao, and Ban Zheng. Mathematical recommendations to fight against covid-19. *Available at SSRN 3551006*, 2020.
- [3] Char Leung. Estimating the distribution of the incubation period of 2019 novel coronavirus (covid-19) infection between travelers to hubei, china and non-travelers. *medRxiv*, 2020.
- [4] Yan Bai, Lingsheng Yao, Tao Wei, Fei Tian, Dong-Yan Jin, Lijuan Chen, and Meiyun Wang. Presumed asymptomatic carrier transmission of covid-19. *Jama*, 2020.
- [5] Natalie M Linton, Tetsuro Kobayashi, Yichi Yang, Katsuma Hayashi, Andrei R Akhmetzhanov, Sung-mok Jung, Baoyin Yuan, Ryo Kinoshita, and Hiroshi Nishiura. Incubation period and other epidemiological characteristics of 2019 novel coronavirus infections with right truncation: A statistical analysis of publicly available case data. *Journal of Clinical Medicine*, 9(2):538, 2020.
- [6] Benjamin F Maier and Dirk Brockmann. Effective containment explains subexponential growth in recent confirmed covid-19 cases in china. *Science*, 368(6492):742–746, 2020.
- [7] Yi Li, Xianhong Yin, Meng Liang, Xiaoyu Liu, Meng Hao, and Yi Wang. A note on ncp diagnosis number prediction model. *medRxiv*, 2020.
- [8] Fotios Petropoulos and Spyros Makridakis. Forecasting the novel coronavirus covid-19. *PloS one*, 15(3):e0231236, 2020.
- [9] Alessandro Vespignani, Huaiyu Tian, Christopher Dye, James O Lloyd-Smith, Rosalind M Eggo, Munik Shrestha, Samuel V Scarpino, Bernardo Gutierrez, Moritz UG Kraemer, Joseph Wu, et al. Modelling covid-19. *Nature Reviews Physics*, pages 1–3, 2020.
- [10] Cleo Anastassopoulou, Lucia Russo, Athanasios Tsakris, and Constantinos Siettos. Data-based analysis, modelling and forecasting of the covid-19 outbreak. *PloS one*, 15(3):e0230405, 2020.
- [11] Marta C Gonzalez, Cesar A Hidalgo, and Albert-Laszlo Barabasi. Understanding individual human mobility patterns. *nature*, 453(7196):779–782, 2008.
- [12] Chaoming Song, Tal Koren, Pu Wang, and Albert-László Barabási. Modelling the scaling properties of human mobility. *Nature Physics*, 6(10):818–823, 2010.
- [13] Marino Gatto, Enrico Bertuzzo, Lorenzo Mari, Stefano Miccoli, Luca Carraro, Renato Casagrandi, and Andrea Rinaldo. Spread and dynamics of the covid-19 epidemic in italy: Effects of emergency containment measures. *Proceedings of the National Academy of Sciences*, 117(19):10484–10491, 2020.
- [14] Dirk Brockmann, Lars Hufnagel, and Theo Geisel. The scaling laws of human travel. *Nature*, 439(7075):462–465, 2006.
- [15] Andrea Baronchelli and Filippo Radicchi. Lévy flights in human behavior and cognition. *Chaos, Solitons & Fractals*, 56:101–105, 2013.
- [16] V Zaburdaev, S Denisov, and J Klafter. Lévy walks. *Reviews of Modern Physics*, 87(2):483, 2015.
- [17] Matteo Chinazzi, Jessica T Davis, Marco Ajelli, Corrado Gioannini, Maria Litvinova, Stefano Merler, Ana Pastore y Piontti, Kunpeng Mu, Luca Rossi, Kaiyuan Sun, et al. The effect of travel restrictions on the spread of the 2019 novel coronavirus (covid-19) outbreak. *Science*, 2020.
- [18] Simiao Chen, Juntao Yang, Weizhong Yang, Chen Wang, and Till Bärnighausen. Covid-19 control in china during mass population movements at new year. *The Lancet*, 2020.
- [19] Shengjie Lai, Nick W Ruktanonchai, Liangcai Zhou, Olivia Prosper, Wei Luo, Jessica R Floyd, Amy Wesolowski, Mauricio Santillana, Chi Zhang, Xiangjun Du, et al. Effect of non-pharmaceutical interventions to contain covid-19 in china. 2020.
- [20] Bnaya Gross, Dana Vaknin, Sergey Buldyrev, and Shlomo Havlin. Two transitions in spatial modular networks. *New Journal of Physics*, 2020.
- [21] Moritz UG Kraemer, Chia-Hung Yang, Bernardo Gutierrez, Chieh-Hsi Wu, Brennan Klein, David M Pigott, Louis Du Plessis, Nuno R Faria, Ruoran Li, William P Hanage, et al. The effect of human mobility and control measures on the covid-19 epidemic in china. *Science*, 368(6490):493–497, 2020.
- [22] Huaiyu Tian, Yonghong Liu, Yidan Li, Chieh-Hsi Wu, Bin Chen, Moritz UG Kraemer, Bingying Li, Jun Cai, Bo Xu, Qiqi Yang, et al. An investigation of transmission control measures during the first 50 days of the covid-19 epidemic in china. *Science*, 368(6491):638–642, 2020.
- [23] Filippo Simini, Marta C González, Amos Maritan, and Albert-László Barabási. A universal model for mobility and migration patterns. *Nature*, 484(7392):96–100, 2012.
- [24] Kathakali Biswas and Parongama Sen. Space-time dependence of corona virus (covid-19) outbreak. *arXiv preprint arXiv:2003.03149*, 2020.
- [25] Romualdo Pastor-Satorras and Alessandro Vespignani. Epidemic spreading in scale-free networks. *Physical Review Letters*, 86(14):3200, 2001.
- [26] Facundo Piguillem and Liyan Shi. Optimal covid-19 quarantine and testing policies. 2020.
- [27] Jennifer Beam Dowd, Liliana Andriano, David M Brazel, Valentina Rotondi, Per Block, Xuejie Ding, Yan Liu, and Melinda C Mills. Demographic science aids in understanding the spread and fatality rates of covid-19. *Proceedings of the National Academy of Sciences*, 117(18):9696–9698, 2020.
